# Supplementary material for: LDL-mediated chemoresistance to Lapatinib involves dysregulation of CYP3A4, SULT1A1, and HER2 signaling in HER2+ breast cancer
Source: Research Square preprint supplement (doi:10.21203/rs.3.rs-8015205/v1), 2025-12-17
Supplement: Supplementary file 1 [file 92da0c436e592c36106cdc64.pdf]

1 **Supplementary Material**

2

3

4

5

6

7

8

9

10

11

12

13

14

15

16

17

18

19

20

21

22

23

24

25

26

27

28

29

30

31

32

33

34

35

36

37

38

39

40

41

42

43

44

45

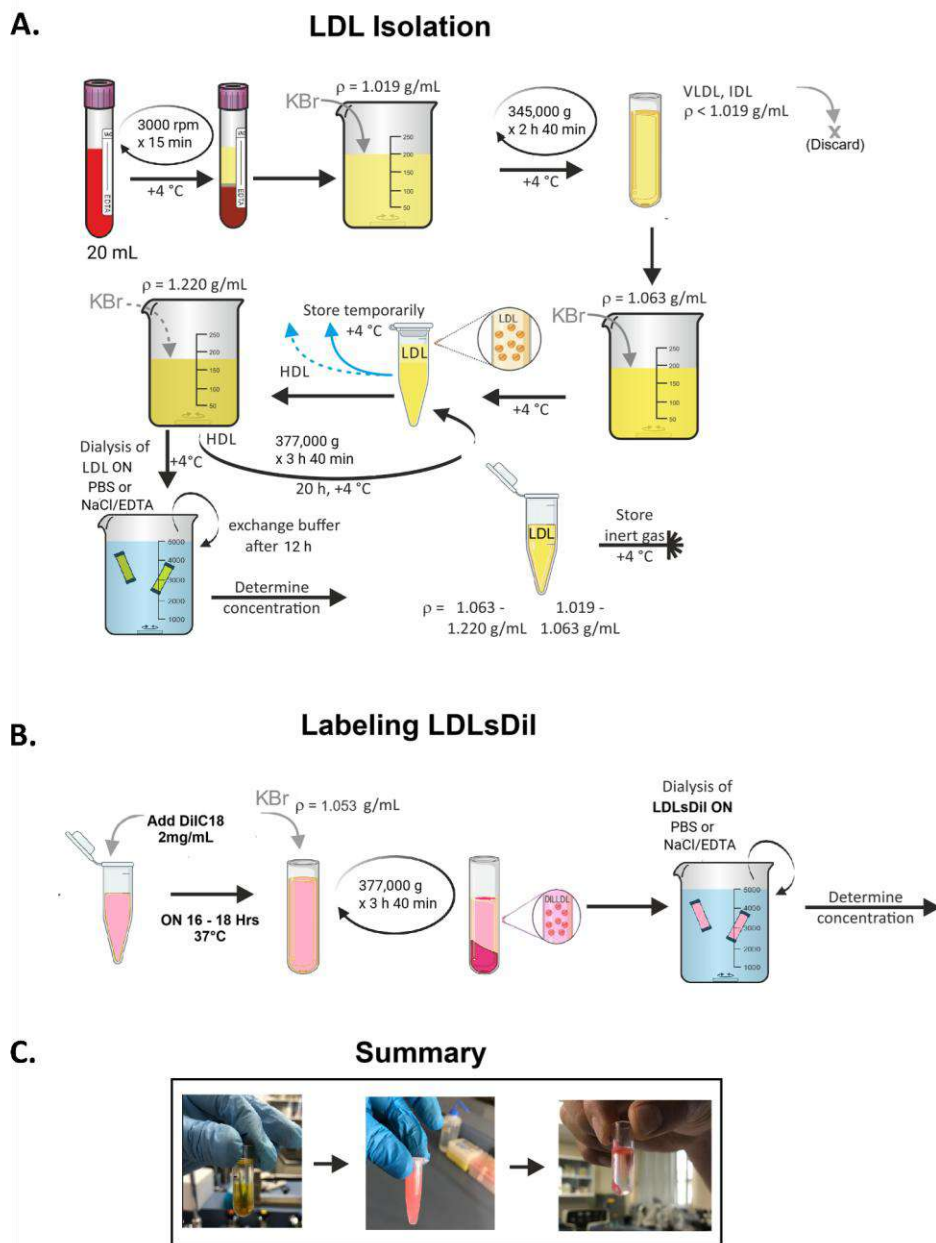

**Sup. fig. 1. Isolation and labeling of LDLs with the DilC18 probe. A.** The procedure for the isolation of lipoproteins is observed using the differential ultracentrifugation technique; an S140-AT 2555 rotor was used (Taken and modified from Axmann et al., 2019). **B.** Labeling of nLDLs subsequent to their isolation. **C.** A summary of the process with real pictures.

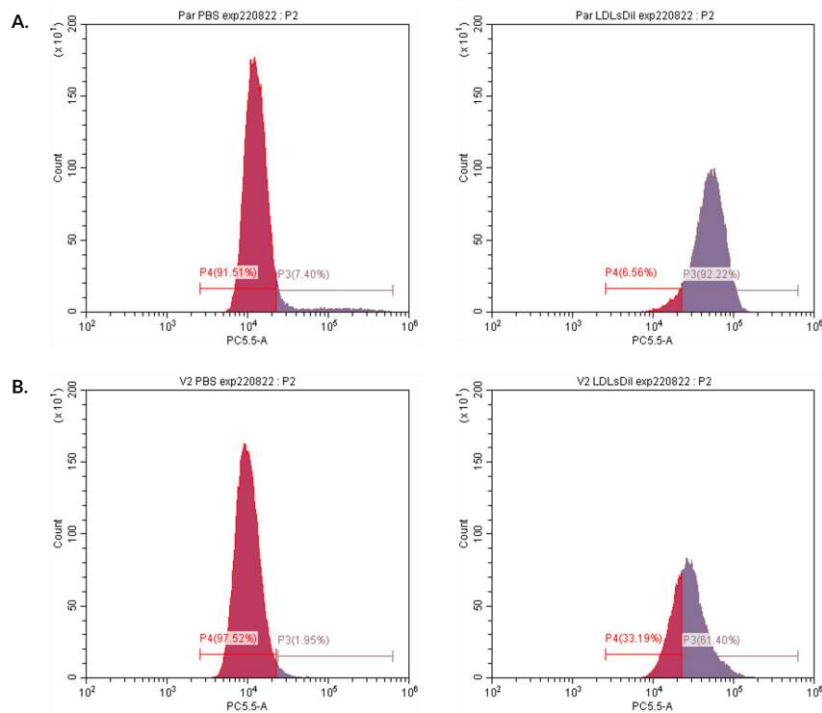

46  
 47  
 48  
 49  
 50  
 51  
 52  
 53  
 54  
 55  
 56  
 57  
 58  
 59  
 60

**Sup. fig. 2. Histograms of DiI-LDL internalization (0–50  $\mu\text{g}/\text{mL}$ ) and incubation of 24 h. (A–B) percentages comparing Parental and Variant 2 (LapR V2). A. Left histogram corresponds to BT474 parental control cells, i.e., without treatment. Right histogram corresponds to parental cells treated with LDLs labeled with the fluorescent probe Dil. B. Left histogram corresponds to resistant cells (LapR V2) without any treatment, using only 1X PBS as the vehicle. Right histogram corresponds to the internalization percentages obtained for LapRV2 resistant cells labeled with the probe D282. Using PBS 1X as a vehicle control.**

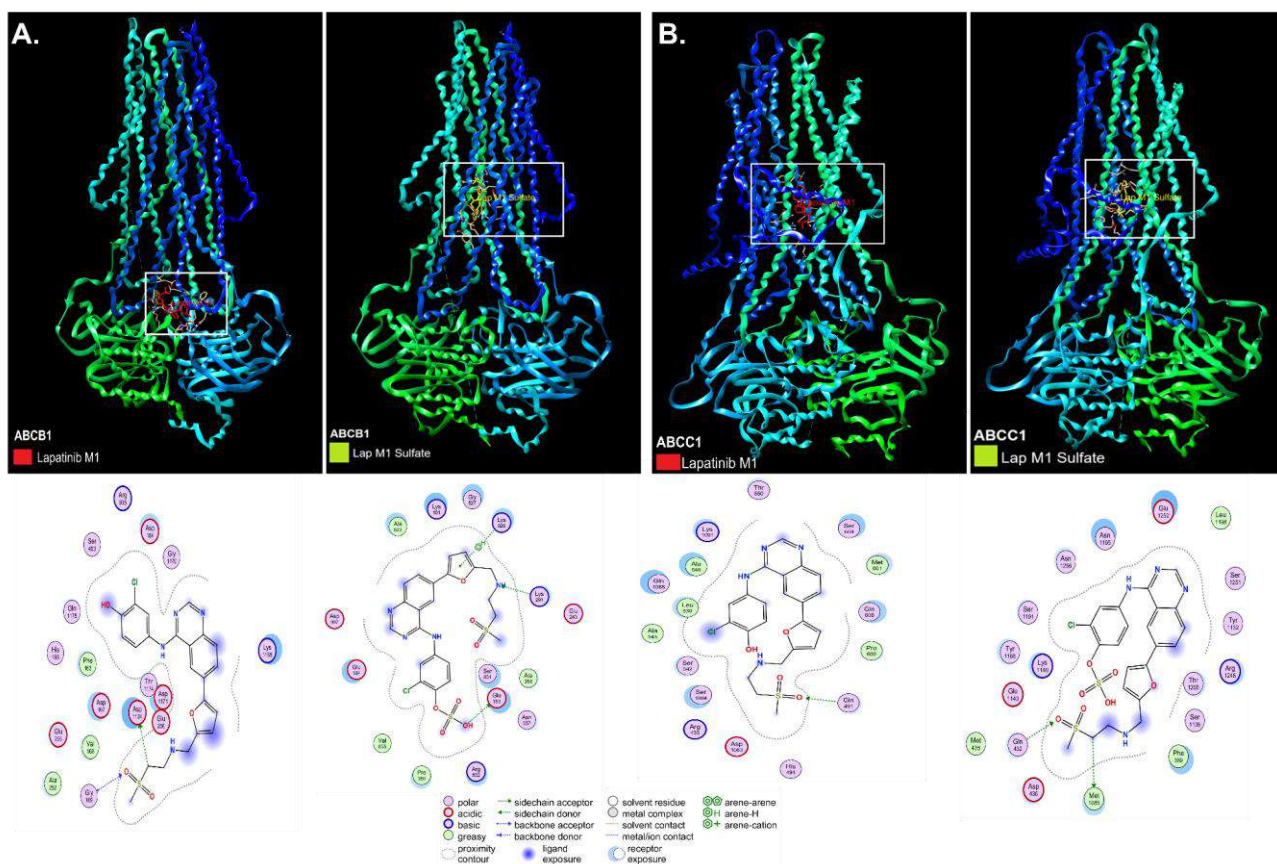

61  
 62 **Sup. fig. 3.** Molecular docking of Lapatinib M1 and Lapatinib M1 Sulfate and the ABC  
 63 transporters. **A.** Figure corresponding to the ligand Interaction of ABCB1 transporter  
 64 (6c0v) + Lapatinib M1 and Lap M1 Sulfate. **B.** Figures corresponding to the Ligand  
 65 Interaction ABCC1 (6uy0) + Lapatinib M1 and Lap M1 Sulfate. In both transporters Lapatinib  
 66 M1 is shown in red and Lapatinib M1 Sulfate in yellow-green.

67  
 68  
 69  
 70  
 71  
 72  
 73  
 74  
 75  
 76  
 77  
 78  
 79  
 80  
 81  
 82  
 83  
 84

85  
86  
87  
88  
89  
90  
91  
92  
93  
94  
95  
96  
97  
98  
99  
100  
101  
102  
103  
104  
105  
106  
107  
108  
109  
110  
111  
112  
113

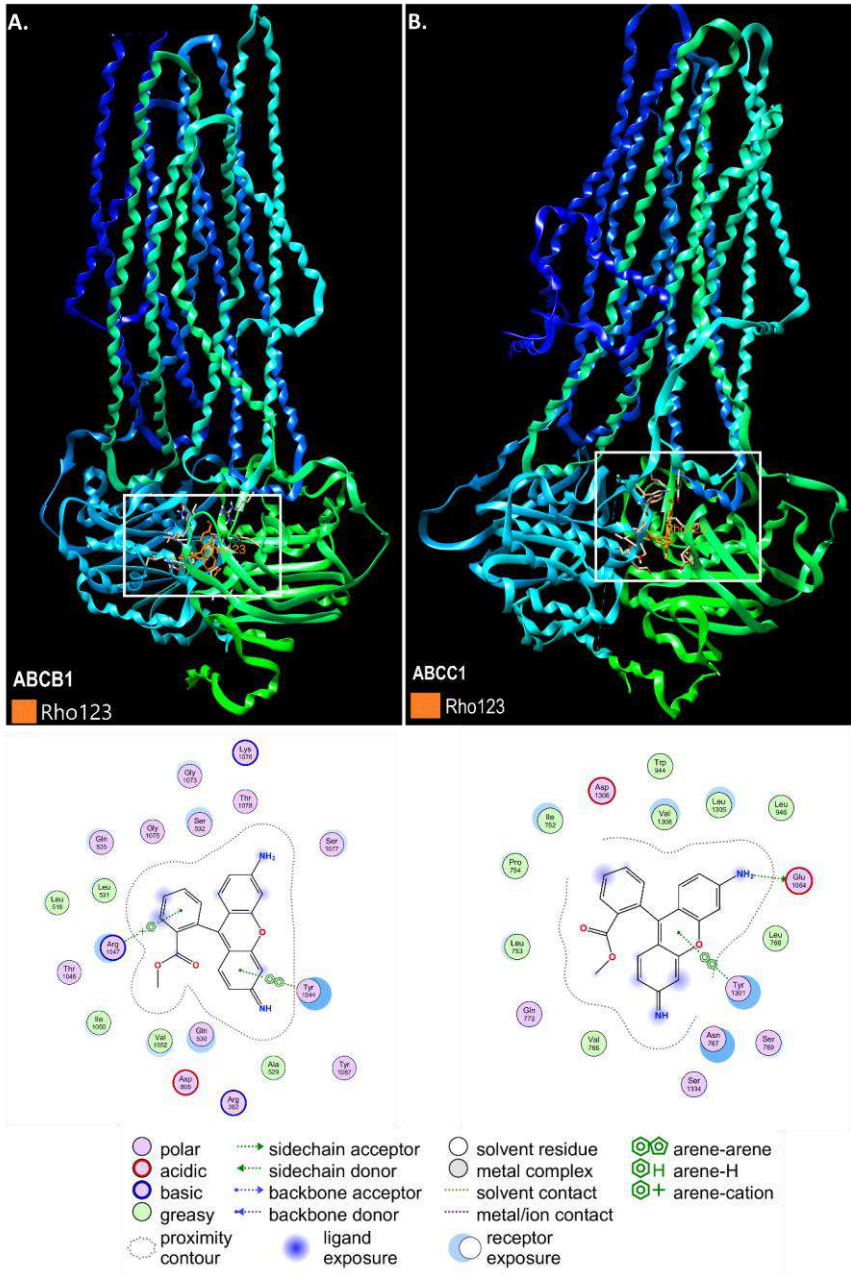

**Sup. fig. 4. Molecular docking of Rhodamine 123 and the ABC transporters. A-B.** Figures corresponding to the Ligand Interaction of ABCB1 transporter (PDB:6c0v) and Ligand Interaction of ABCC1 (6uy0) vs Rhodamine123 as a control. Rho123 are shown in orange.

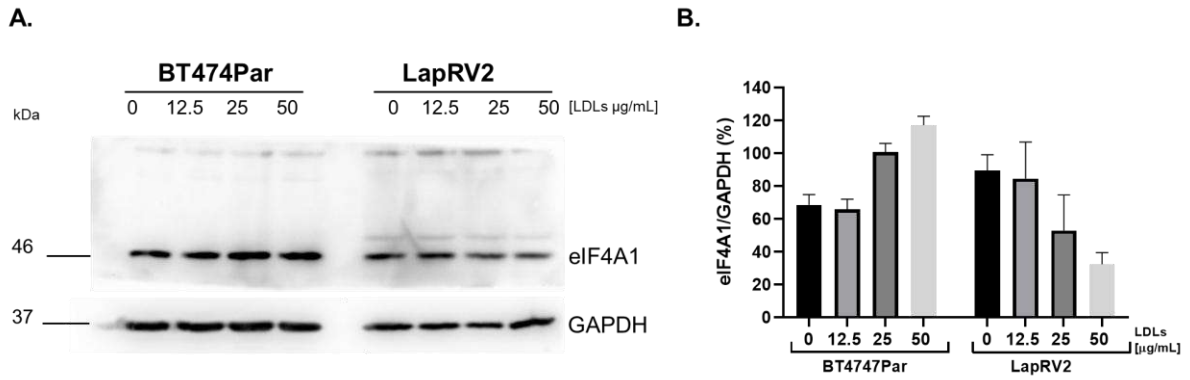

114

115 **Sup fig. 5. eIF4A1 expression under LDLs treatments** **A.** Representative Western blots  
 116 showing protein expression of levels of eIF4A1 in BT474Par and LapRV2 cells. **B.**  
 117 Densitometry analysis of eIF4A1 under LDL increasing concentrations (0-50 µg/mL) for 48 h.  
 118 Data represent the mean ± SD of three independent experiments, and GAPDH was used as a  
 119 loading control.

120

121

122

123

124

125

126

127

128

129

130

131

132

133

134

135

136

137

138
